# 1 **Increased microtubule lattice spacing correlates with selective binding** 2 **of kinesin-1 in cells**

3 Leanne de Jager<sup>1</sup>, Klara I. Jansen<sup>2</sup>, Lukas C. Kapitein<sup>2\*</sup>, Friedrich Förster<sup>1\*</sup>, Stuart C. Howes<sup>1\*</sup>

4 1. Structural Biochemistry, Department of Chemistry, Bijvoet Centre for Biomolecular Research, Utrecht  
5 University, The Netherlands

6 2. Cell Biology, Neurobiology and Biophysics, Department of Biology, Faculty of Science, Utrecht  
7 University, The Netherlands

8 \*Correspondence: s.c.howes@uu.nl, f.g.forster@uu.nl or l.kapitein@uu.nl

9

## 10 **Abstract**

11 Within the cell cargo is transported via motor proteins walking along microtubules. The affinity of  
12 motor proteins for microtubules is controlled by various layers of regulation like tubulin isoforms, post-  
13 translational modifications and microtubule associated proteins. Recently, the conformation of the  
14 microtubule lattice has also emerged as a potential regulatory factor, but to what extent it acts as an  
15 additional layer of regulation has remained unclear. In this study, we used cryo-correlative light and  
16 electron microscopy to study microtubule lattices inside cells. We find that, while most microtubules  
17 have a compacted lattice (~41 Å), a significant proportion of the microtubule cores have expanded  
18 lattice spacings and that these lattice spacings could be modulated by the microtubule stabilizing drug  
19 Taxol. Furthermore, kinesin-1 predominantly binds microtubules with a more expanded lattice spacing  
20 (~41.6 Å). The different lattice spacings present in the cell can thus act as an additional factor that  
21 modulates the binding of motor proteins to specific microtubule subsets.

22

## 23 **Introduction**

24 Microtubules are highly dynamic, polarized cytoskeletal structures along which motor proteins move  
25 to transport cargos throughout the cell. To achieve efficient cargo transport, the binding of motor  
26 proteins to specific subsets of microtubules is highly regulated. The multiple layers of regulation and  
27 modifications that mark the different populations of microtubules and influence the downstream  
28 behaviour of motor proteins have together been termed the tubulin code (Verhey and Gaertig, 2007).  
29 Many of the components of this code, like tubulin isoforms, post-translational modifications (PTMs)  
30 and microtubule associated proteins (MAPs), have been identified (Gadadhar et al., 2017; Janke and  
31 Magiera, 2020; Roll-Mecak, 2020). However, the tubulin code is potentially still incomplete as it does  
32 not explain all motor protein behaviour observed *in vivo*.

33 Specifically, the motor protein kinesin-1 is known to be regulated by various components of  
34 the tubulin code (Janke and Magiera, 2020). For example, the binding properties of kinesin-1 are  
35 modulated by MAPs. Binding of MAP7 leads to activation of kinesin-1, namely by increasing its run

36 length, while tau has the opposite effect (Ferro et al., 2022; Hooikaas et al., 2019; Monroy et al., 2018).  
37 Furthermore, kinesin-1 binds with greater affinity to a subset of stable microtubules (typically enriched  
38 in the PTMs acetylation and detyrosination) than to microtubules without these modifications (Cai et  
39 al., 2009; Dunn et al., 2008; Guardia et al., 2016; Konishi and Setou, 2009; Liao and Gundersen, 1998;  
40 Tas et al., 2017). However, *in vitro* experiments to date, where different levels of these PTMs were  
41 investigated, have not reproduced the behaviour of kinesin-1 that is observed *in vivo* (Kaul et al., 2014;  
42 Sirajuddin et al., 2014; Walter et al., 2012). In addition, upon treatments that lead to acetylation or  
43 detyrosination of most cellular microtubules, kinesin-1 still binds to a subset of stable microtubules  
44 (Jansen et al., 2021). This indicates that the tubulin code for kinesin-1 is not completely understood.

45 An additional layer of regulation might come from the structure of the microtubule itself, as  
46 several studies have shown that proteins are sensitive to its lattice spacing and/or nucleotide state  
47 (Manka and Moores, 2018a; Zhang et al., 2018). Upon polymerization of free  $\alpha\beta$ -tubulin dimers into  
48 microtubules, GTP bound to  $\beta$ -tubulin is hydrolysed to GDP and the structural conformation of the  $\alpha\beta$ -  
49 tubulin dimer changes (Alushin et al., 2014). This GDP-bound state, which makes up the bulk of the  
50 microtubule core, generally has a compacted average monomer spacing of  $\sim 41$  Å that is distinct from  
51 that of the GTP-bound state at the tip (GTP-cap), which has an expanded lattice spacing of  $\sim 42$  Å as  
52 determined for hydrolysis deficient mutants and the slowly-hydrolysable GTP analogue guanylyl-( $\alpha,\beta$ -  
53 methylene-diphosphonate (GMPCPP) (Hyman et al., 1995; LaFrance et al., 2021). Besides the  
54 nucleotide state, drugs, like the anti-cancer drug Taxol, can alter the lattice spacing of the microtubule  
55 (Kellogg et al., 2017). Some MAPs can differentiate between these different lattice spacings. For  
56 example, end binding proteins and doublecortin preferentially bind to the GTP-cap of the microtubule  
57 (Bechstedt and Brouhard, 2012; Tirnauer and Bierer, 2000), while Tau (Duan et al., 2017) and MAP2  
58 preferentially bind to microtubules in the GDP-bound state (Siahaan et al., 2021). A similar lattice  
59 sensitivity might partially explain the observed microtubule-subset specificity of kinesin-1.

60 *In vitro* data show that kinesin-1 binds expanded microtubules with a higher affinity than  
61 microtubules in the compacted state and that kinesin-1 binds microtubules assembled with GMPCPP at  
62 a higher frequency than GDP-bound microtubules (Shima et al., 2018). Moreover, GDP-microtubules,  
63 when heavily decorated with kinesin-1, were reported to be more expanded than undecorated  
64 microtubules (Shima et al., 2018) and saturating concentrations of kinesin-1 induced microtubule lattice  
65 expansion (Peet et al., 2018). However, these experiments were all performed in reconstituted systems  
66 using brain tubulin that contains a diverse mixture of PTMs and tubulin isoforms (Schwarz et al., 1998).  
67 Additionally, the observed effects depended on the kinesin-1 concentrations used, but the relationship  
68 to *in vivo* concentrations was not established. It is thus still unclear to what extent the microtubule lattice  
69 spacing plays a regulatory role within the cell.

70 To investigate if subsets of microtubules with varying lattice states exist within cells, and to  
71 determine if kinesin-1 preferentially binds a particular lattice, we established a cryo-correlative light  
72 and electron microscopy (cryo-CLEM) workflow. We show here that microtubules can have diverse  
73 lattice spacings in cells and that Taxol treatment greatly expands the lattice. Furthermore, we find that  
74 kinesin-1-decorated microtubules are predominately expanded in cells.

75

## 76 **Results and discussion**

### 77 **Microtubule lattice spacings within cells are diverse but mainly compacted**

78 To examine the lattice spacing of microtubules in cells, we cultured U2OS cells on EM grids, vitrified  
79 them, and prepared ~150 nm thick lamellae using cryo-focused ion beam (FIB) milling for subsequent  
80 cryo-electron tomography imaging (Rigort et al., 2012). To measure the lattice spacing of cellular  
81 microtubules, we used a layer line approach based on Fourier analysis of microtubule segments (Figure  
82 1A). Building from typical 2D analysis of *in vitro* microtubules (Mandelkow et al., 1977), the protocol  
83 masks out microtubule density from surrounding cellular material and aligns the segments in 3D (Figure  
84 1B), prior to projection and computation of the 2D Fourier transforms (Figure 1C and Supplemental  
85 Figure 1). Summed power spectra of the aligned microtubule segments were then used to measure the  
86 lattice periodicity based on maxima in a line profile plot (Figure 1G).

87 We first assessed the lattice spacing of microtubules from untreated U2OS cells using this *in*  
88 *situ* layer line analysis. In line with *in vitro* results of GDP-bound microtubules, 74% (23 out of 31) had  
89 a compacted average monomer spacing of 40.8-41.1 Å (Figure 1H). The remaining microtubules had  
90 an expanded spacing of 41.5-42.7 Å. These distinct lattice spacings could even be detected within the  
91 same tomogram (Supplemental Figure 2). Our results indicate that microtubule lattice spacings are  
92 diverse even far away from microtubule tips, where an altered lattice spacing is expected (Hyman et al.,  
93 1995; LaFrance et al., 2021). Within the field of view of our data, which is approximately 0.8 µm, we  
94 did not observe any microtubule ends. In contrast to the changes in lattice spacing at microtubule ends,  
95 which are important for the regulation of microtubule growth dynamics (Manka and Moores, 2018b),  
96 the different lattice spacings that we observe in the core of the microtubule likely play a role in  
97 microtubule stability, MAP binding and motor protein kinetics, as has been previously postulated  
98 (Cross, 2019).

99 To confirm that our *in situ* layer line analysis is sensitive to changes in lattice spacing, we set  
100 out to modulate the microtubule lattice and test whether this change could be detected. Microtubules  
101 that are polymerized *in vitro* in the presence of Taxol are structurally altered compared to the GDP-  
102 bound, compacted state (Alushin et al., 2014; Kellogg et al., 2017; Rai et al., 2019). We therefore  
103 hypothesized that Taxol might expand microtubules inside cells as well. Indeed, in U2OS cells treated  
104 with Taxol we observed that most microtubules (92%, 11/12) have an expanded lattice spacing of 42.3-

105 43.2 Å (Figure 1D-H), significantly different from the untreated distribution (p-value = 0.0006).  
106 Together, these data show that changes in lattice spacing can be detected with our *in situ* layer line  
107 analysis and that the overall distribution of microtubule lattice spacings can be altered by Taxol.

108 Remarkably, the Taxol-induced expansion to 41.2-42.0 Å observed *in vitro* is considerably  
109 smaller than the hyper-expansion measured using our *in situ* approach (Alushin et al., 2014; Estevez-  
110 Gallego et al., 2020; Kellogg et al., 2017; Rai et al., 2019; Vale et al., 1994). A complex interplay  
111 between Taxol, MAPs and PTMs might exist as up or downregulation of MAPs, like Tau, can affect  
112 the sensitivity of cells to Taxol (Orr et al., 2003). Additionally, Taxol treatment leads to an increase in  
113 PTMs like acetylation (Hammond et al., 2010). These components are usually completely or partially  
114 absent from *in vitro* systems, which may explain why this hyper-expansion has thus far remained  
115 unreported.

116

### 117 **Fluorescence microscopy-guided cryo-FIB milling**

118 Having established that different microtubule lattice spacings can be monitored within the cell, we next  
119 set out to determine the lattice spacing distribution of the subset of microtubules to which kinesin-1  
120 selectively binds (Burute and Kapitein, 2019). To this end we used rigor-2xmNeonGreen, a  
121 fluorescently tagged mutant of kinesin-1 that has a very low rate of microtubule unbinding and binds to  
122 a subset of stable microtubules (Jansen et al., 2021). We set up a two-step cryo-CLEM workflow,  
123 wherein fluorescence microscopy (FM) data of U2OS Flp-In T-Rex cells expressing rigor-  
124 2xmNeonGreen were used to target lamella preparation sites in the first correlation step (Figure 2A),  
125 and then used to distinguish the kinesin-1 bound microtubules from unbound microtubules in the  
126 lamella visible in the transmission electron microscope (TEM) in the second step (Figure 3A). For the  
127 first step, the extracellular beads visible in both the FM stack and the SEM image were used to overlay  
128 the FM stacks of the rigor-2xmNeonGreen (Figure 2B) and endocytosed fBSA-Au<sup>5</sup> beads (Figure 2C)  
129 (Fermie et al., 2022) with the SEM image (Figure 2D). The resulting overlay (Figure 2E) was used for  
130 targeted milling (Figure 2F).

131 The FM-SEM localization accuracy was estimated using a “leave-one-out” metric (see  
132 materials and methods) and showed an FM-SEM correlation error with a standard deviation of 121 nm  
133 in x and of 116 nm in y (Figure 2G). The slight increase in accuracy that we obtained in comparison to  
134 the previous accuracy measurements obtained by Arnold et al. might be due to the increased number of  
135 beads we used for calculating the transform (Arnold et al., 2016). This estimated localization error  
136 confirmed that the FM-SEM correlation was sufficiently accurate for our CLEM approach.

137

### 138 **Kinesin-1-bound microtubules inside cells are expanded**

139 Next, the correlated FM data were overlaid with the TEM overview image of the lamella (Figure 3A).  
140 To confirm that the FM-TEM correlation was successful, fBSA-Au<sup>5</sup> beads present in the FM data were

141 localized in the TEM image of the lamella (Figure 3B-E) and fine adjustments based on the higher  
142 resolution TEM data were performed. This was critical as the microtubules alone did not allow for  
143 assessment or optimization of the correlation (Figure 3F). When the correlation was considered  
144 unambiguous and reliable, the rigor-2xmNeonGreen data was used to localize the kinesin-1 bound  
145 microtubules within the lamella (Figure 3G-I). Analysis of their lattice spacings revealed a clear shift  
146 towards a more expanded lattice distribution, centred around 41.5-41.9 Å (p-value = 0.045), in  
147 comparison to the dominant compacted lattice observed for untargeted microtubules (Figure 3J). The  
148 observed distribution was also significantly different from the lattice distribution observed for Taxol  
149 treated cells (p-value = 0.0107). Our results indicate therefore that kinesin-1 bound microtubules inside  
150 cells are predominately more expanded than those not bound by kinesin-1.

151 The observed preference for an expanded lattice might relate to the structure of kinesin-1 or  
152 result from cooperative behaviour with other MAPs. The specific length of the neck linker of kinesin-  
153 1 results in a notably high processivity compared to other kinesin motors (Shastry and Hancock, 2010;  
154 Yildiz et al., 2008). An expanded lattice might better accommodate the step size and increase  
155 processivity further. In these experiments the structural changes that occur upon microtubule expansion  
156 may result in an increased interaction and binding affinity between the L11- $\alpha$ 4 junction of kinesin-1  
157 and the H3 helix of  $\alpha$ -tubulin (Morikawa et al., 2015; Shima et al., 2018). Alternatively, additional  
158 interactions with MAPs, such as MAP7 that may be sensitive to the lattice spacing, could ultimately be  
159 responsible for recruiting kinesin-1 (Ferro et al., 2022; Hooikaas et al., 2019; Monroy et al., 2020).

160 Despite the additional correlation accuracy gained with the intracellular beads, we cannot  
161 exclude that a proportion of the kinesin-1 bound microtubules were identified incorrectly due to the  
162 limited resolution of our cryo-FM setup. This fractional misassignment might contribute to the large  
163 spread observed in lattice spacings for the kinesin-1-bound microtubule-subset. Technical FM  
164 improvements such as cryo-MINFLUX (Gwosch et al., 2020), engineered point spread functions (Zhou  
165 et al., 2019) or integrated FM-FIB solutions (Bieber et al., 2021) may improve the cryo-FM resolution  
166 (lateral and/or axial) and resulting CLEM localization accuracy, as well as the throughput of future  
167 cryo-CLEM workflows. Nevertheless, the current workflow, which uses an additional independent  
168 marker (the fBSA-Au<sup>5</sup> beads) for the FM-TEM correlation, can readily be used to answer a broad range  
169 of biological questions.

170 Taken together, our approach provides an unbiased way to investigate microtubule lattice  
171 spacings inside the cell. We found that most microtubules have a compacted lattice of around 41 Å, in  
172 line with previous *in vitro* and *in situ* studies (Figure 4, row I and II). Importantly, we observed that a  
173 range of expanded lattices can be found within the cell. Thus far, expanded states have only been  
174 reported in *in vitro* studies when microtubules are assembled using the GTP analogue GMPCPP or the  
175 drug Taxol (Figure 4, row III and IV). The relevance of different lattice spacings for MAP behaviour  
176 has only been investigated for a few examples and expanded lattices have mostly been linked to plus-  
177 end regulating proteins (Figure 4, row V). However, our data, together with *in vitro* data, indicate that

178 kinesin-1 preferentially binds to an expanded lattice (Peet et al., 2018; Shima et al., 2018). The  
179 microtubule lattice might therefore function as an additional mechanism to guide protein binding  
180 specificity, on top of the previously established elements of the tubulin code. Similar analysis on other  
181 members of the kinesin family may reveal the extent to which these motors are sensitive to the lattice  
182 spacing of microtubules.

183 In this paper we present a two-step cryo-CLEM workflow, which we used to study microtubule  
184 lattice spacing within unperturbed cells, upon Taxol treatment, and in correlation with kinesin-1  
185 binding. The discovery of diverse microtubule lattice spacings within the cell emphasizes the need to  
186 further investigate the relationship between the microtubule lattice and protein binding behaviour.  
187 Furthermore, this study shows the potential of our cryo-CLEM workflow to gain new insights into well-  
188 studied biological processes from intact cells.

## 189 **Acknowledgements**

190 We thank Alessandro Sartori (Institute of Molecular Cancer Research, Switzerland) for providing us  
191 with the U2OS Flp-In T-Rex stable cells, Vladan Lucic and Mihajlo Vanevic for computational support,  
192 Mariska Gröllers-Mulderij for guidance in cell culture, Rutger Hermsen for the input on statistical data  
193 analysis, Mathieu Baltussen for help with figure design and Nalan Liv for providing us with the  
194 intracellular fBSA-Au<sup>5</sup> beads. This work was supported by the ERC Consolidator grant 724425  
195 (Biogenesis and Degradation of Endoplasmic Reticulum Proteins, to F.F.) and ERC Consolidator grant  
196 819219 (to L.C. Kapitein), and was part of the research programme National Roadmap for Large-Scale  
197 Research Infrastructure 2017 – 2018 with project number 184.034.014, which is (partly) financed by  
198 the Dutch Research Council (NWO). K.I. Jansen was funded by NWO (NWO-Graduate program  
199 project 022.006.001 to K.I. Jansen). The Netherlands Electron Microscopy Infrastructure (NEMI)  
200 helped support access to the Netherlands Center for Electron Nanoscopy (NeCEN) with support from  
201 operators Wen Yang and Willem Noteborn.

## 202 **Competing interest**

203 Nothing declared.

204

## 205 **Materials and Methods**

### 206 **List of reagents:**

| Reagent or resource                                     | Source                               | Identifier       |
|---------------------------------------------------------|--------------------------------------|------------------|
| <b>Q5 HF DNA polymerase</b>                             | NEB                                  | Cat# M0491L      |
| <b>Gibson Assembly® Master Mix</b>                      | NEB                                  | Cat# E2611L      |
| <b>DMEM + GlutaMAX-I</b>                                | GIBCO                                | Cat# 61965-026   |
| <b>DPBS</b>                                             | Corning                              | Cat# 21-031-CV   |
| <b>Pen Strep</b>                                        | GIBCO                                | Cat# 15140-122   |
| <b>Trypsin-EDTA</b>                                     | Gibco                                | Cat# 25200-056   |
| <b>Fetal Bovine Serum</b>                               | Sigma-Aldrich, Inc.                  | Cat# F7525-500ML |
| <b>Fibronectin</b>                                      | Sigma-Aldrich, Inc.                  | Cat# F1141-2MG   |
| <b>Blasticidin</b>                                      | Thermo Fisher Scientific             | Cat# R21001      |
| <b>Hygromycin B</b>                                     | Corning                              | Cat# 30-240CR    |
| <b>Paclitaxel/Taxol</b>                                 | Thermo Fisher Scientific             | Cat# P3456       |
| <b>Doxycycline</b>                                      | Sigma-Aldrich, Inc.                  | Cat# 24390-14-5  |
| <b>fBSA-Au<sup>5</sup></b>                              | Cell Microscopy Core, Utrecht<br>UMC | N.A.             |
| <b>Dynabeads™ MyOne™ Carboxylic Acid</b>                | Thermo Fisher Scientific             | Cat# 65011       |
| <b>Cellview cell culture dish</b>                       | Greiner bio-one                      | Cat# 627860      |
| <b>Quantifoil 200 mesh holey carbon R2/2 gold grids</b> | Quantifoil Micro Tools               | N.A.             |
| <b>Whatman Filter Paper</b>                             | Whatman                              | Cat# 10311610    |

207

### 208 **Cell lines and cell culture**

209 U2OS wild type (WT) cells were purchased from ATCC and U2OS Flp-In T-Rex cells were a kind gift  
 210 from Prof. Alessandro Sartori (Institute of Molecular Cancer Research, University of Zurich). Cells  
 211 were confirmed to be free of mycoplasma. The U2OS Flp-In cell line that upon doxycycline-induction  
 212 expresses hKif5b(1-560)G234A-mNeongreen-mNeongreen (hereafter referred to as rigor-  
 213 2xmNeongreen) (Jansen et al., 2021) was derived from the U2OS Flp-In cell line by transfection with  
 214 the pCDN5/FRT/TO vector (Invitrogen) and pOG44 vector (Invitrogen). The U2OS rigor-  
 215 2xmNeongreen cell line was cultured in Dulbecco's Modified Eagle's Medium + GlutaMAX™-1  
 216 (DMEM-Glu) supplemented with 10% FBS, 100 U/ml penicillin, 100 µg/ml streptomycin, 15 µg/ml  
 217 blasticidin S and 0.25 mg/ml hygromycin B. To induce expression of rigor-2xmNeongreen, doxycycline  
 218 (10 ng/mL) was added to the cells 24 hrs before plunging. U2OS WT cells were cultured in DMEM-

219 Glu supplement with 10% FBS, 100 U/ml penicillin and 100 µg/ml streptomycin. Cells were kept at  
220 37°C and 5% CO<sub>2</sub>.

221

## 222 **Plasmids and cloning**

223 To generate a stable, isogenic U2OS Flp-In cell line, rigor-2xmNeongreen was subcloned into  
224 pCDNA5/FRT/TO (Invitrogen) via Gibson Assembly using the primer set ‘5-GCTCGGATCCACTAG  
225 TCCAGTGTGGTGAATTCTGCAGATGCCACCATGGCGGACCT-3’ and 5’-ACGGGCCCTCT  
226 AGACTCGAGCGGCCGCGCCACTGTGCTGGATGCGGCCGCTTACTTGTACAG-3’. The G234A  
227 rigor mutation was used as initially described (Rice et al., 1999). mNeongreen (Shaner et al., 2013) was  
228 provided by Allele Biotechnology. The FLP recombinase expression vector is encoded in pOG44  
229 (Invitrogen).

230

## 231 **Sample preparation**

232 Quantifoil 200 mesh holey carbon R2/2 gold grids (Quantifoil Micro Tools) were glow discharged  
233 (PELCO easiGlow, Ted Pella) and placed on 40 µL fibronectin droplets (50 µg/µL) and incubated at  
234 37°C for 2-3 hrs. Subsequently, the grids were washed two times by placing them on droplets of 40 µL  
235 PBS and put in 35 mm glass bottom dishes (Greiner Bio-One). 90.000 cells in 2 mL medium were  
236 seeded on these grids and were left to settle in the hood for ~20 min. before placing them in the  
237 incubator. After 24 hrs, the U2OS rigor-2xmNeongreen cells were treated with doxycycline (10 ng/mL)  
238 while WT U2OS cells were treated with Taxol (1 µM), if applicable. Plunging was performed 48 hrs  
239 after cell seeding. In preparation for vitrification, the cells were incubated with fBSA-Au<sup>5</sup> (diluted to  
240 OD 5) for 3-4 hrs (Fermie et al., 2022). Just before plunging, the media was exchanged for fresh DMEM.  
241 The grids were washed by dipping 2 times in PBS (37°C) before 3 µL of 1 µm Dynabeads (Thermo  
242 Fisher Scientific: MyOne with 40% iron oxide, carboxylic acid) diluted 1:20 in PBS, was added to the  
243 grids. Finally, the cells were vitrified in liquid ethane after manually blotting for 10s. The grids were  
244 clipped into autogrids and kept at liquid nitrogen temperature throughout the subsequent experiments.

245

## 246 **SEM grid screening**

247 To increase efficiency, although at the cost of ice contamination, grids were screened in the cryo-FIB  
248 SEM (Aquilos<sup>TM</sup>, Thermo Fisher Scientific), prior to fluorescent imaging. SEM grid overview images  
249 were taken using FEI MAPS 3.8 software. Grids with clearly visible grid holes and an appropriate  
250 distribution of cells were used in the next steps of the cryo-CLEM workflow.

251



## 252 **Cryo-fluorescence microscopy**

253 Cryo-FM data were obtained with the FEI CorrSight™ equipped with a cryo-stage, using the  
254 Andromeda spinning-disk confocal microscope module. Grid overviews were collected with a 5x/0.16  
255 NA air objective using transmitted light. SEM overview images were aligned to the FM overview  
256 images via 3-point correlation in the MAPs v3.8 software (Thermo Fisher Scientific). Based on the  
257 SEM and FM overlay, candidate cells were selected. Using the EC “Plan-Neofluar” 40x/0.9 NA air  
258 objective, z-stacks ranging from 8-14 μm with 300 nm step size were collected. Z-stacks were recorded  
259 to capture 3 different fluorescent probes, namely rigor-2xmNeogreen (488 nm), Dynabeads (488 nm)  
260 and fBSA-Au<sup>5</sup> (561 nm). Images were recorded with FEI MAPS v3.8 software and LA FEI Live  
261 Acquisition v2.2.0 (Thermo Fisher Scientific). The images were subjected to a mild deconvolution  
262 using Huygens Professional software v 21.04 (Scientific Volume Imaging) with classic maximum  
263 likelihood estimation algorithm.

264

## 265 **Targeted cryo-focussed ion beam milling**

266 Cryo-FIB milling was performed in the cryo-FIB SEM (Aquilos™, Thermo Fisher Scientific). Lamellae  
267 were prepared as described previously (Wagner et al., 2020). SEM grid overview images were obtained  
268 and overlaid with the cryo-FM overview images using 3-point correlation available in the MAPS v3.8  
269 software to guide the localization of candidate lamella sites. The grids were coated with platinum to  
270 reduce charging effects. Eucentric heights and minimal stage tilt angles (16-18°, corresponding to 9-  
271 11° lamella angle), to ensure access of the ions to the milling sites, were determined. High magnification  
272 SEM images (0.135 μm/pixel, 1 μs dwell time, 1,536x1,024 pixels, 2 keV, 13 pA) of each target cell  
273 were taken and manually overlaid with the corresponding cryo-FM maximum image projection (MIP)  
274 using Dynabeads as fiducials. The location of the milling patterns was based on the correlated cryo-FM  
275 data. An FM-FIB correlation was not included in our workflow as this is a time-intensive procedure -  
276 and the limited z-resolution of our cryo-FM set up meant this correlation did not add significant  
277 information when tested.

278         Next, the grids were subjected to organo-platinum deposition for 10 s via an integrated gas  
279 injection system to generate a more even surface and thereby reduce curtaining effects and protect the  
280 final lamella. Milling was performed with a stepwise decreasing current of 1 to 0.3 to 0.1 nA, and a  
281 shrinking milling pattern. The final polishing step was performed at 30 pA to reach a final lamella  
282 thickness of 80-140 nm. High magnification SEM images of the polished lamellae were taken (0.135  
283 μm/pixel, 300 ns dwell time, 1,536x1,024 pixels, 2 keV, 13 pA) and the grids were coated with platinum  
284 for a second time before unloading.

## 285 **Targeted cryo-electron tomography**

286 In preparation for FM-guided cryo-electron tomography data collection, SEM images of polished  
287 lamellae were aligned to the corresponding cryo-FM z-stacks, guided by high-dose SEM images of the  
288 lamella sites. Using the 3D Correlation toolbox (Arnold et al., 2016) 6-9 Dynabeads were localized both  
289 in the SEM image and the FM z-stack and a transformation matrix was fitted for the two sets of X,Y,Z  
290 coordinates, while aiming for an RMSD smaller than 1 pixel for each bead. Z-stacks were transformed  
291 according to this matrix with the 3D rigid body transformation of the Pyto python package (Arnold et  
292 al., 2016). MIPs of the transformed z-stack of each channel were overlaid with the SEM image of the  
293 polished lamella in FIJI (Schindelin et al., 2012) to generate a correlated FM-SEM overlay.

294 Lamellae were imaged on a 200 kV Talos Arctica transmission electron microscope (TEM)  
295 (Thermo Fisher Scientific) with a K2 summit direct electron detector (Gatan) or on a 300 kV FEI Titan  
296 Krios TEM (Thermo Fisher Scientific) with a K3 summit direct electron detector (Gatan), both  
297 equipped with a post-column energy filter aligned to the zero-loss peak and a 20 keV slit width. Using  
298 SerialEM (Mastrorade, 2003), lamellae overview images were taken at 7,300x (Arctica, 18.7 Å/pixel)  
299 or 4,800x (Krios, 38.6 Å/pixel).

300 The TEM overview image of the lamella and the corresponding FM-SEM overlay were further  
301 manually correlated. This last correlation step was guided by the bimodal intracellular fBSA-Au<sup>5</sup>  
302 fiducials. In cases where the rigor-2xmNeongreen FM signal overlapped with a microtubule in the cryo-  
303 TEM lamella image, a tilt series was collected. The microtubules in the lamellae of untreated and Taxol  
304 treated cells were chosen at random. Tilt series of microtubules were recorded at a pixel size of 2.17  
305 Å/px, a dose rate of ~5 (Arctica) or 10-20 (Krios) e<sup>-</sup>/pixel/s and a total dose of 90-100 e<sup>-</sup>/Å<sup>2</sup>. All tilt  
306 series were collected using a dose symmetric scheme (Hagen et al., 2017), a tilt increment of 2° or 3°,  
307 a defocus target of -2.3 μm, and a tilt range of 69° to -51° or 51° to -69°, depending on the lamella  
308 orientation in the microscope.

309

## 310 **Tomogram reconstruction**

311 The tilt series were aligned and dose-weighted using MotionCor2 (Zheng et al., 2017). The tilt series  
312 were generally aligned via patch tracking. If fBSA-Au<sup>5</sup> beads were present, fiducial tracking was used.  
313 Tomogram reconstruction was performed in Etomo, part of the IMOD 4.10.29 package (Kremer et al.,  
314 1996). Contrast transfer function estimation and correction was performed in IMOD using the *ctfplotter*  
315 and *ctfphaseflip* commands and the tomograms were reconstructed using weighted back-projection and  
316 a SIRT-like filter with 3 iterations.

317

## 318 **Layer line analysis**

319 Reconstructed tomograms were loaded in Dynamo (Castano-Diez et al., 2017). The filament model  
320 (crop along axis) was used to pick the microtubule backbone. The backbone coordinates were exported

321 from MATLAB and used to generate a soft mask around the microtubule [in house script, available on  
322 GitHub at ldejager/InSitu\_LayerLine\_Analysis]. Particles with a box size of 190 pixels were extracted  
323 from the unbinned, masked tomograms. Microtubule particles were aligned in Dynamo using a  
324 reference based on a previously deposited microtubule structure (EMD-10896). After alignment, the  
325 particles were inspected using the *dGallery* command. Per microtubule, multiple aligned particles were  
326 selected to cover the whole microtubule. These particles were extracted from the unbinned tomograms  
327 with a box size of 1,030 pixels and summed along the z-axis [in-house script, available on GitHub at  
328 ldejager/InSitu\_LayerLine\_Analysis]. The power spectrum of each particle was calculated in FIJI. The  
329 power spectra of the particles from the same microtubule were summed to increase the signal-to-noise  
330 ratio. Layer lines were localized by calculating a line profile plot of the power spectrum. The average  
331 lattice spacing of the microtubule was calculated using formula 1.

$$332 \quad Lattice \ spacing = \frac{pixel \ size \left(\frac{A}{pix}\right) \times box \ size}{|Equator \ location \ (pix) - Layer \ line \ location \ (pix)|} \quad (1)$$

333

### 334 **Statistical analysis**

335 Leave-one-out calculations were performed as described by (Schorb and Briggs, 2014). Briefly, a  
336 transformation matrix was calculated with a set of beads. This transform was applied to a bead not  
337 included in the initial set. The deviation of the predicted bead position from the true bead position was  
338 used as an accuracy measurement. P-values for comparison of the different lattice spacing distributions  
339 were calculated with a unpaired two-tailed t-test based permutation test with 10,000 iterations. Lattice  
340 spacing density distribution (figure 4) was calculated as a gaussian kernel density estimate. Permutation  
341 tests were performed in and graphs (histograms and distribution) were created with Jupyter notebook  
342 6.0.3 (Kluyver et al., 2016).

## 343 References

- 344 Alushin, G. M., Lander, G. C., Kellogg, E. H., Zhang, R., Baker, D. & Nogales, E. (2014) High-resolution  
345 microtubule structures reveal the structural transitions in alphabeta-tubulin upon GTP  
346 hydrolysis. *Cell*, 157(5), 1117-29. 10.1016/j.cell.2014.03.053.
- 347 Arnold, J., Mahamid, J., Lucic, V., de Marco, A., Fernandez, J. J., Laugks, T., Mayer, T., Hyman, A. A.,  
348 Baumeister, W. & Plitzko, J. M. (2016) Site-Specific Cryo-focused Ion Beam Sample  
349 Preparation Guided by 3D Correlative Microscopy. *Biophys J*, 110(4), 860-9.  
350 10.1016/j.bpj.2015.10.053.
- 351 Bechstetd, S. & Brouhard, Gary J. (2012) Doublecortin Recognizes the 13-Protofilament Microtubule  
352 Cooperatively and Tracks Microtubule Ends. *Developmental Cell*, 23(1), 181-192.  
353 10.1016/j.devcel.2012.05.006.
- 354 Bieber, A., Capitano, C., Schiøtz, O., Smeets, M., Fenzke, J., Erdmann, P. & Plitzko, J. (2021) Precise  
355 3D-correlative FIB-milling of biological samples using METEOR, an integrated cryo-CLEM  
356 imaging system. *Microscopy and Microanalysis*, 27(S1), 3230-3232.  
357 10.1017/S1431927621011132.
- 358 Burute, M. & Kapitein, L. C. (2019) Cellular Logistics: Unraveling the Interplay Between Microtubule  
359 Organization and Intracellular Transport. *Annu Rev Cell Dev Biol*, 35, 29-54.  
360 10.1146/annurev-cellbio-100818-125149.
- 361 Cai, D., McEwen, D. P., Martens, J. R., Meyhofer, E. & Verhey, K. J. (2009) Single molecule imaging  
362 reveals differences in microtubule track selection between Kinesin motors. *PLoS Biol*, 7(10),  
363 e1000216. 10.1371/journal.pbio.1000216.
- 364 Castano-Diez, D., Kudryashev, M. & Stahlberg, H. (2017) Dynamo Catalogue: Geometrical tools and  
365 data management for particle picking in subtomogram averaging of cryo-electron  
366 tomograms. *J Struct Biol*, 197(2), 135-144. 10.1016/j.jsb.2016.06.005.
- 367 Cross, R. A. (2019) Microtubule lattice plasticity. *Curr Opin Cell Biol*, 56, 88-93.  
368 10.1016/j.ceb.2018.10.004.
- 369 Duan, A. R., Jonasson, E. M., Alberico, E. O., Li, C., Scripture, J. P., Miller, R. A., Alber, M. S. &  
370 Goodson, H. V. (2017) Interactions between Tau and Different Conformations of Tubulin:  
371 Implications for Tau Function and Mechanism. *J Mol Biol*, 429(9), 1424-1438.  
372 10.1016/j.jmb.2017.03.018.
- 373 Dunn, S., Morrison, E. E., Liverpool, T. B., Molina-París, C., Cross, R. A., Alonso, M. C. & Peckham, M.  
374 (2008) Differential trafficking of Kif5c on tyrosinated and detyrosinated microtubules in live  
375 cells. *J Cell Sci*, 121(Pt 7), 1085-95. 10.1242/jcs.026492.
- 376 Estevez-Gallego, J., Josa-Prado, F., Ku, S., Buey, R. M., Balaguer, F. A., Prota, A. E., Lucena-Agell, D.,  
377 Kamma-Lorger, C., Yagi, T., Iwamoto, H., Duchesne, L., Barasoain, I., Steinmetz, M. O.,  
378 Chretien, D., Kamimura, S., Diaz, J. F. & Oliva, M. A. (2020) Structural model for differential  
379 cap maturation at growing microtubule ends. *Elife*, 9. 10.7554/eLife.50155.
- 380 Fermie, J., de Jager, L., Foster, H. E., Veenendaal, T., de Heus, C., van Dijk, S., ten Brink, C., Oorschot,  
381 V., Yang, L., Li, W., Müller, W. H., Howes, S., Carter, A. P., Förster, F., Posthuma, G.,  
382 Gerritsen, H. C., Klumperman, J. & Liv, N. (2022) Bimodal endocytic probe for three-  
383 dimensional correlative light and electron microscopy. *Cell Reports Methods*, 100220.  
384 doi:10.1016/j.crmeth.2022.100220.
- 385 Ferro, L. S., Fang, Q., Eshun-Wilson, L., Fernandes, J., Jack, A., Farrell, D. P., Golcuk, M., Huijben, T.,  
386 Costa, K., Gur, M., DiMaio, F., Nogales, E. & Yildiz, A. (2022) Structural and functional insight  
387 into regulation of kinesin-1 by microtubule-associated protein MAP7. *Science*, 375(6578),  
388 326-331. doi:10.1126/science.abf6154.
- 389 Gadadhar, S., Bodakuntla, S., Natarajan, K. & Janke, C. (2017) The tubulin code at a glance. *J Cell Sci*,  
390 130(8), 1347-1353. 10.1242/jcs.199471.

- 391 Guardia, Carlos M., Farías, Ginny G., Jia, R., Pu, J. & Bonifacino, Juan S. (2016) BORC Functions  
392 Upstream of Kinesins 1 and 3 to Coordinate Regional Movement of Lysosomes along  
393 Different Microtubule Tracks. *Cell Reports*, 17(8), 1950-1961. 10.1016/j.celrep.2016.10.062.
- 394 Gwosch, K. C., Pape, J. K., Balzarotti, F., Hoess, P., Ellenberg, J., Ries, J. & Hell, S. W. (2020) MINFLUX  
395 nanoscopy delivers 3D multicolor nanometer resolution in cells. *Nature Methods*, 17(2), 217-  
396 224. 10.1038/s41592-019-0688-0.
- 397 Hagen, W. J. H., Wan, W. & Briggs, J. A. G. (2017) Implementation of a cryo-electron tomography tilt-  
398 scheme optimized for high resolution subtomogram averaging. *Journal of Structural Biology*,  
399 197(2), 191-198. 10.1016/j.jsb.2016.06.007.
- 400 Hammond, J. W., Huang, C.-F., Kaech, S., Jacobson, C., Banker, G. & Verhey, K. J. (2010)  
401 Posttranslational Modifications of Tubulin and the Polarized Transport of Kinesin-1 in  
402 Neurons. *Molecular Biology of the Cell*, 21(4), 572-583. 10.1091/mbc.e09-01-0044.
- 403 Hooikaas, P. J., Martin, M., Muhlethaler, T., Kuijntjes, G. J., Peeters, C. A. E., Katrukha, E. A., Ferrari,  
404 L., Stucchi, R., Verhagen, D. G. F., van Riel, W. E., Grigoriev, I., Altelaar, A. F. M., Hoogenraad,  
405 C. C., Rudiger, S. G. D., Steinmetz, M. O., Kapitein, L. C. & Akhmanova, A. (2019) MAP7 family  
406 proteins regulate kinesin-1 recruitment and activation. *J Cell Biol*, 218(4), 1298-1318.  
407 10.1083/jcb.201808065.
- 408 Hyman, A. A., Chrétien, D., Arnal, I. & Wade, R. H. (1995) Structural changes accompanying GTP  
409 hydrolysis in microtubules: information from a slowly hydrolyzable analogue guanylyl-  
410 (alpha,beta)-methylene-diphosphonate. *Journal of Cell Biology*, 128(1), 117-125.  
411 10.1083/jcb.128.1.117.
- 412 Janke, C. & Magiera, M. M. (2020) The tubulin code and its role in controlling microtubule properties  
413 and functions. *Nature Reviews Molecular Cell Biology*, 21(6), 307-326. 10.1038/s41580-020-  
414 0214-3.
- 415 Jansen, K. I., Burute, M. & Kapitein, L. C. (2021) A live-cell marker to visualize the dynamics of stable  
416 microtubules. *bioRxiv*, 2021.06.23.449589. 10.1101/2021.06.23.449589.
- 417 Kaul, N., Soppina, V. & Verhey, K. J. (2014) Effects of alpha-tubulin K40 acetylation and  
418 detyrosination on kinesin-1 motility in a purified system. *Biophys J*, 106(12), 2636-43.  
419 10.1016/j.bpj.2014.05.008.
- 420 Kellogg, E. H., Hejab, N. M. A., Howes, S., Northcote, P., Miller, J. H., Diaz, J. F., Downing, K. H. &  
421 Nogales, E. (2017) Insights into the Distinct Mechanisms of Action of Taxane and Non-Taxane  
422 Microtubule Stabilizers from Cryo-EM Structures. *J Mol Biol*, 429(5), 633-646.  
423 10.1016/j.jmb.2017.01.001.
- 424 Kluyver, T., Ragan-Kelley, B., Pérez, F., Granger, B. E., Bussonnier, M., Frederic, J., Kelley, K., Hamrick,  
425 J. B., Grout, J. & Corlay, S. (2016) *Jupyter Notebooks—a publishing format for reproducible*  
426 *computational workflows*.
- 427 Konishi, Y. & Setou, M. (2009) Tubulin tyrosination navigates the kinesin-1 motor domain to axons.  
428 *Nature Neuroscience*, 12(5), 559-567. 10.1038/nn.2314.
- 429 Kremer, J. R., Mastronarde, D. N. & McIntosh, J. R. (1996) Computer visualization of three-  
430 dimensional image data using IMOD. *J Struct Biol*, 116(1), 71-6. 10.1006/jsbi.1996.0013.
- 431 LaFrance, B. J., Roostalu, J., Henkin, G., Greber, B. J., Zhang, R., Normanno, D., McCollum, C., Surrey,  
432 T. & Nogales, E. (2021) Structural transitions in the GTP cap visualized by cryo-EM of  
433 catalytically inactive microtubules. *bioRxiv*. 10.1101/2021.08.13.456308.
- 434 Liao, G. & Gundersen, G. G. (1998) Kinesin is a candidate for cross-bridging microtubules and  
435 intermediate filaments. Selective binding of kinesin to detyrosinated tubulin and vimentin. *J*  
436 *Biol Chem*, 273(16), 9797-803. 10.1074/jbc.273.16.9797.
- 437 Mandelkow, E., Thomas, J. & Cohen, C. (1977) Microtubule structure at low resolution by x-ray  
438 diffraction. *Proc Natl Acad Sci U S A*, 74(8), 3370-4. 10.1073/pnas.74.8.3370.
- 439 Manka, S. W. & Moores, C. A. (2018a) Microtubule structure by cryo-EM: snapshots of dynamic  
440 instability. *Essays Biochem*, 62(6), 737-751. 10.1042/EBC20180031.

- 441 Manka, S. W. & Moores, C. A. (2018b) The role of tubulin–tubulin lattice contacts in the mechanism  
442 of microtubule dynamic instability. *Nature Structural & Molecular Biology*, 25(7), 607-615.  
443 10.1038/s41594-018-0087-8.
- 444 Mastronarde, D. N. (2003) SerialEM: A Program for Automated Tilt Series Acquisition on Tecnai  
445 Microscopes Using Prediction of Specimen Position. *Microscopy and Microanalysis*, 9(S02),  
446 1182-1183. 10.1017/S1431927603445911.
- 447 Monroy, B. Y., Sawyer, D. L., Ackermann, B. E., Borden, M. M., Tan, T. C. & Ori-McKenney, K. M.  
448 (2018) Competition between microtubule-associated proteins directs motor transport.  
449 *Nature Communications*, 9(1), 1487. 10.1038/s41467-018-03909-2.
- 450 Monroy, B. Y., Tan, T. C., Oclaman, J. M., Han, J. S., Simó, S., Niwa, S., Nowakowski, D. W., McKenney,  
451 R. J. & Ori-McKenney, K. M. (2020) A Combinatorial MAP Code Dictates Polarized  
452 Microtubule Transport. *Dev Cell*, 53(1), 60-72.e4. 10.1016/j.devcel.2020.01.029.
- 453 Morikawa, M., Yajima, H., Nitta, R., Inoue, S., Ogura, T., Sato, C. & Hirokawa, N. (2015) X-ray and  
454 Cryo-EM structures reveal mutual conformational changes of Kinesin and GTP-state  
455 microtubules upon binding. *The EMBO Journal*, 34(9), 1270-1286.  
456 10.15252/embj.201490588.
- 457 Orr, G. A., Verdier-Pinard, P., McDaid, H. & Horwitz, S. B. (2003) Mechanisms of Taxol resistance  
458 related to microtubules. *Oncogene*, 22(47), 7280-95. 10.1038/sj.onc.1206934.
- 459 Peet, D. R., Burroughs, N. J. & Cross, R. A. (2018) Kinesin expands and stabilizes the GDP-microtubule  
460 lattice. *Nat Nanotechnol*, 13(5), 386-391. 10.1038/s41565-018-0084-4.
- 461 Rai, A., Liu, T., Glauser, S., Katrukha, E. A., Estevez-Gallego, J., Rodriguez-Garcia, R., Fang, W. S., Diaz,  
462 J. F., Steinmetz, M. O., Altmann, K. H., Kapitein, L. C., Moores, C. A. & Akhmanova, A. (2019)  
463 Taxanes convert regions of perturbed microtubule growth into rescue sites. *Nat Mater*,  
464 19(3), 355-365. 10.1038/s41563-019-0546-6.
- 465 Rice, S., Lin, A. W., Safer, D., Hart, C. L., Naber, N., Carragher, B. O., Cain, S. M., Pechatnikova, E.,  
466 Wilson-Kubalek, E. M., Whittaker, M., Pate, E., Cooke, R., Taylor, E. W., Milligan, R. A. & Vale,  
467 R. D. (1999) A structural change in the kinesin motor protein that drives motility. *Nature*,  
468 402(6763), 778-84. 10.1038/45483.
- 469 Rigort, A., Bäuerlein, F. J. B., Villa, E., Eibauer, M., Laugks, T., Baumeister, W. & Plitzko, J. M. (2012)  
470 Focused ion beam micromachining of eukaryotic cells for cryoelectron tomography.  
471 *Proceedings of the National Academy of Sciences*, 109(12), 4449-4454.  
472 10.1073/pnas.1201333109.
- 473 Roll-Mecak, A. (2020) The Tubulin Code in Microtubule Dynamics and Information Encoding.  
474 *Developmental Cell*, 54(1), 7-20. 10.1016/j.devcel.2020.06.008.
- 475 Schindelin, J., Arganda-Carreras, I., Frise, E., Kaynig, V., Longair, M., Pietzsch, T., Preibisch, S.,  
476 Rueden, C., Saalfeld, S., Schmid, B., Tinevez, J. Y., White, D. J., Hartenstein, V., Eliceiri, K.,  
477 Tomancak, P. & Cardona, A. (2012) Fiji: an open-source platform for biological-image  
478 analysis. *Nat Methods*, 9(7), 676-82. 10.1038/nmeth.2019.
- 479 Schorb, M. & Briggs, J. A. (2014) Correlated cryo-fluorescence and cryo-electron microscopy with  
480 high spatial precision and improved sensitivity. *Ultramicroscopy*, 143, 24-32.  
481 10.1016/j.ultramic.2013.10.015.
- 482 Schwarz, P. M., Liggins, J. R. & Ludueña, R. F. (1998)  $\beta$ -Tubulin Isotypes Purified from Bovine Brain  
483 Have Different Relative Stabilities. *Biochemistry*, 37(13), 4687-4692. 10.1021/bi972763d.
- 484 Shaner, N. C., Lambert, G. G., Chamma, A., Ni, Y., Cranfill, P. J., Baird, M. A., Sell, B. R., Allen, J. R.,  
485 Day, R. N., Israelsson, M., Davidson, M. W. & Wang, J. (2013) A bright monomeric green  
486 fluorescent protein derived from Branchiostoma lanceolatum. *Nat Methods*, 10(5), 407-9.  
487 10.1038/nmeth.2413.
- 488 Shastry, S. & Hancock, W. O. (2010) Neck linker length determines the degree of processivity in  
489 kinesin-1 and kinesin-2 motors. *Current biology : CB*, 20(10), 939-943.  
490 10.1016/j.cub.2010.03.065.

- 491 Shima, T., Morikawa, M., Kaneshiro, J., Kambara, T., Kamimura, S., Yagi, T., Iwamoto, H., Uemura, S.,  
492 Shigematsu, H., Shirouzu, M., Ichimura, T., Watanabe, T. M., Nitta, R., Okada, Y. & Hirokawa,  
493 N. (2018) Kinesin-binding-triggered conformation switching of microtubules contributes to  
494 polarized transport. *J Cell Biol*, 217(12), 4164-4183. 10.1083/jcb.201711178.
- 495 Siahhaan, V., Tan, R., Humhalova, T., Libusova, L., Lacey, S. E., Tan, T., Dacy, M., Ori-McKenney, K. M.,  
496 McKenney, R. J., Braun, M. & Lansky, Z. (2021) Microtubule Lattice Spacing Governs  
497 Cohesive Envelope Formation of Tau Family Proteins. *bioRxiv*, 2021.11.08.467404.  
498 10.1101/2021.11.08.467404.
- 499 Sirajuddin, M., Rice, L. M. & Vale, R. D. (2014) Regulation of microtubule motors by tubulin isoforms  
500 and post-translational modifications. *Nature Cell Biology*, 16(4), 335-344. 10.1038/ncb2920.
- 501 Tas, R. P., Chazeau, A., Cloin, B. M. C., Lambers, M. L. A., Hoogenraad, C. C. & Kapitein, L. C. (2017)  
502 Differentiation between Oppositely Oriented Microtubules Controls Polarized Neuronal  
503 Transport. *Neuron*, 96(6), 1264-1271.e5. 10.1016/j.neuron.2017.11.018.
- 504 Tirnauer, J. S. & Bierer, B. E. (2000) EB1 proteins regulate microtubule dynamics, cell polarity, and  
505 chromosome stability. *The Journal of cell biology*, 149(4), 761-766. 10.1083/jcb.149.4.761.
- 506 Vale, R. D., Coppin, C. M., Malik, F., Kull, F. J. & Milligan, R. A. (1994) Tubulin GTP hydrolysis  
507 influences the structure, mechanical properties, and kinesin-driven transport of  
508 microtubules. *Journal of Biological Chemistry*, 269(38), 23769-23775. 10.1016/s0021-  
509 9258(17)31582-x.
- 510 Verhey, K. J. & Gaertig, J. (2007) The tubulin code. *Cell Cycle*, 6(17), 2152-60. 10.4161/cc.6.17.4633.
- 511 Wagner, F. R., Watanabe, R., Schampers, R., Singh, D., Persoon, H., Schaffer, M., Fruhstorfer, P.,  
512 Plitzko, J. & Villa, E. (2020) Preparing samples from whole cells using focused-ion-beam  
513 milling for cryo-electron tomography. *Nat Protoc*, 15(6), 2041-2070. 10.1038/s41596-020-  
514 0320-x.
- 515 Walter, W. J., Beranek, V., Fischermeier, E. & Diez, S. (2012) Tubulin acetylation alone does not affect  
516 kinesin-1 velocity and run length in vitro. *PLoS One*, 7(8), e42218.  
517 10.1371/journal.pone.0042218.
- 518 Watanabe, R., Buschauer, R., Bohning, J., Audagnotto, M., Lasker, K., Lu, T. W., Boassa, D., Taylor, S.  
519 & Villa, E. (2020) The In Situ Structure of Parkinson's Disease-Linked LRRK2. *Cell*, 182(6),  
520 1508-1518 e16. 10.1016/j.cell.2020.08.004.
- 521 Yildiz, A., Tomishige, M., Gennerich, A. & Vale, R. D. (2008) Intramolecular Strain Coordinates Kinesin  
522 Stepping Behavior along Microtubules. *Cell*, 134(6), 1030-1041. 10.1016/j.cell.2008.07.018.
- 523 Zhang, R., LaFrance, B. & Nogales, E. (2018) Separating the effects of nucleotide and EB binding on  
524 microtubule structure. *Proc Natl Acad Sci U S A*, 115(27), E6191-E6200.  
525 10.1073/pnas.1802637115.
- 526 Zheng, S. Q., Palovcak, E., Armache, J. P., Verba, K. A., Cheng, Y. & Agard, D. A. (2017) MotionCor2:  
527 anisotropic correction of beam-induced motion for improved cryo-electron microscopy. *Nat*  
528 *Methods*, 14(4), 331-332. 10.1038/nmeth.4193.
- 529 Zhou, Y., Handley, M., Carles, G. & Harvey, A. R. (2019) Advances in 3D single particle localization  
530 microscopy. *APL Photonics*, 4(6), 060901. 10.1063/1.5093310.

531

532

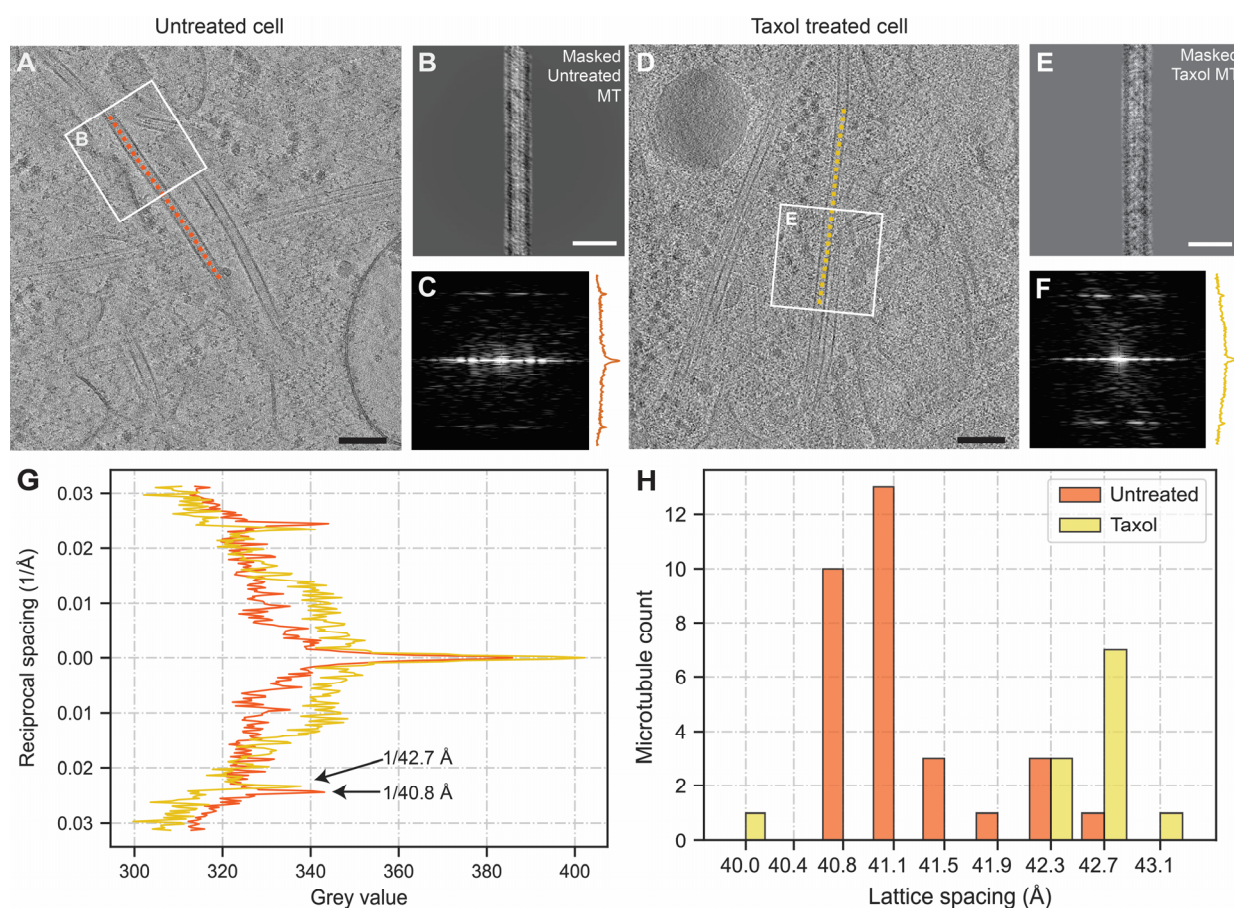

533

534 **Figure 1. Microtubule lattice spacings within cells are diverse and expand upon Taxol treatment.**

535 **(A)** Tomogram slice (thickness 10 nm) showing the selected microtubule (MT) backbone of a MT in

536 an untreated U2OS cell (orange). **(B)** Aligned and masked MT segment from the MT shown in A. **(C)**

537 Power spectrum of the MT segment and its layer line plot from the MT shown in A. **(D-F)** Similar MT

538 layer line analysis performed on Taxol-treated U2OS cells (yellow). **(G)** Layer line plot of the summed

539 power spectra of segments from the same MT in A (orange, untreated) and D (yellow, Taxol), arrows

540 indicate the location of the layer line peak and its related lattice spacing. **(H)** Histogram showing the

541 untreated (orange, N=31, 12 tomograms) and Taxol-treated (yellow, N=12, 4 tomograms) lattice

542 spacings. Scale bars: 100 nm (A,D), 50 nm (B,E). Untreated distribution is significantly different from

543 Taxol distribution (p-value = 0.0006, unpaired t-test based permutation-test).

544

545

546

547



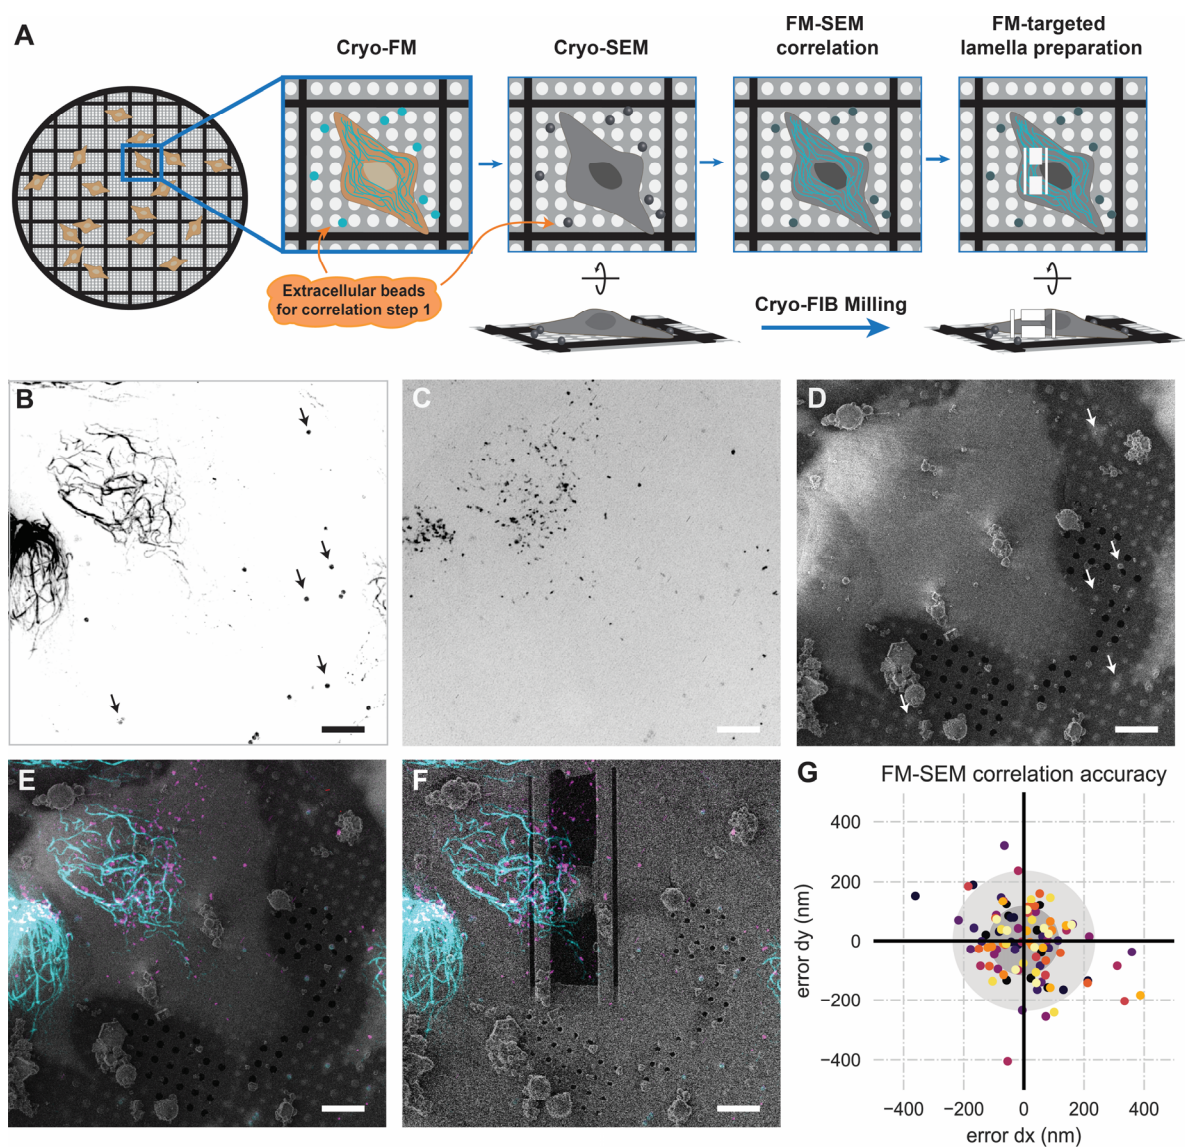

548

549 **Figure 2. Correlation of FM to SEM data for targeted cryo-FIB milling.** (A) Cartoon describing the  
 550 FM-SEM correlation performed using extracellular beads. (B) MIP of a rigor-2xmNeongreen z-stack,  
 551 beads used for 3D correlation are indicated with arrows. (C) MIP of a z-stack with fBSA-Au<sup>5</sup> beads  
 552 used for the subsequent FM-TEM correlation (see Figure 3). (D) Untilted SEM image of the same grid  
 553 square as shown in B and C. (E) Correlated rigor-2xmNeongreen and fBSA-Au<sup>5</sup> overlaid with the  
 554 SEM image. (F) Correlated rigor-2xmNeongreen and fBSA-Au<sup>5</sup> overlaid with the untitled SEM  
 555 image of the polished lamella (milled at a 9 degree angle). (G) Scatterplot of correlation errors from  
 556 leave-one-out calculations, each dataset has a unique colour, grey circles mark the 1xSD and 2xSD  
 557 boundaries (12 datasets, 96 beads). Scale bars: 10  $\mu$ m (B-F).

558

559

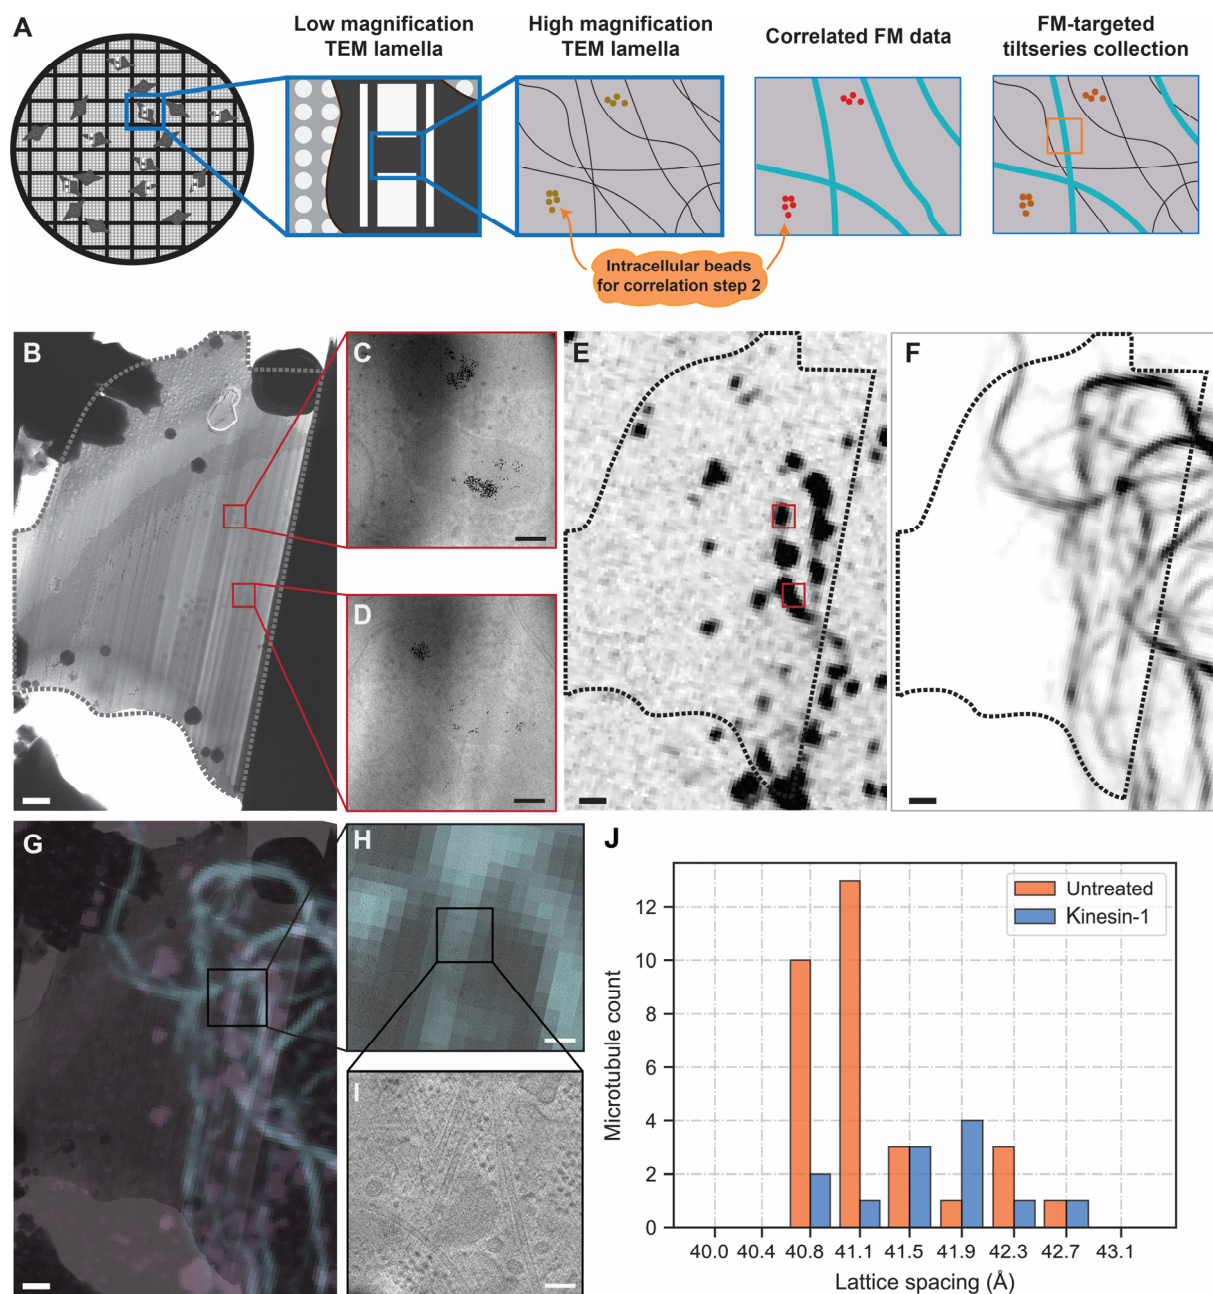

560

561 **Figure 3. Kinesin-1 bound microtubules have a slightly expanded lattice compared to the GDP-**  
 562 **compact lattice.** (A) Cartoon describing the FM-TEM correlation performed using intracellular  
 563 beads. (B) TEM overview image of a lamella, dotted line indicates outline of the lamella, red squares  
 564 the location of the fBSA-Au<sup>5</sup> beads. (C and D) Zoom in of the fBSA-Au<sup>5</sup> beads found both in the TEM  
 565 lamella in B and in the correlated fBSA-Au<sup>5</sup> FM data in E. (E) Correlated fBSA-Au<sup>5</sup> FM data, red  
 566 squares indicate fBSA-Au<sup>5</sup> location. (F) Correlated rigor-bound microtubules. (G) Overlay of TEM  
 567 lamella and correlated FM data of both fBSA-Au<sup>5</sup> (pink) and rigor-bound microtubules (blue). (H and  
 568 I) Two step zoom of two microtubules overlapping with the rigor-bound FM data. (J) Histogram  
 569 showing the untreated lattice spacings (N=31, 12 tomograms, same data as Fig. 1H, included for  
 570 comparison) and the lattice spacings of the kinesin-1 bound subset of microtubules (N=12, 6

571 tomograms). Scale bars: 1  $\mu\text{m}$  (**B, E, F and G**), 100 nm (**C,D and I**), 400 nm (**H**). Untreated distribution  
572 is significantly different from kinesin-1 distribution (p-value = 0.045, unpaired t-test based permutation  
573 test).

574

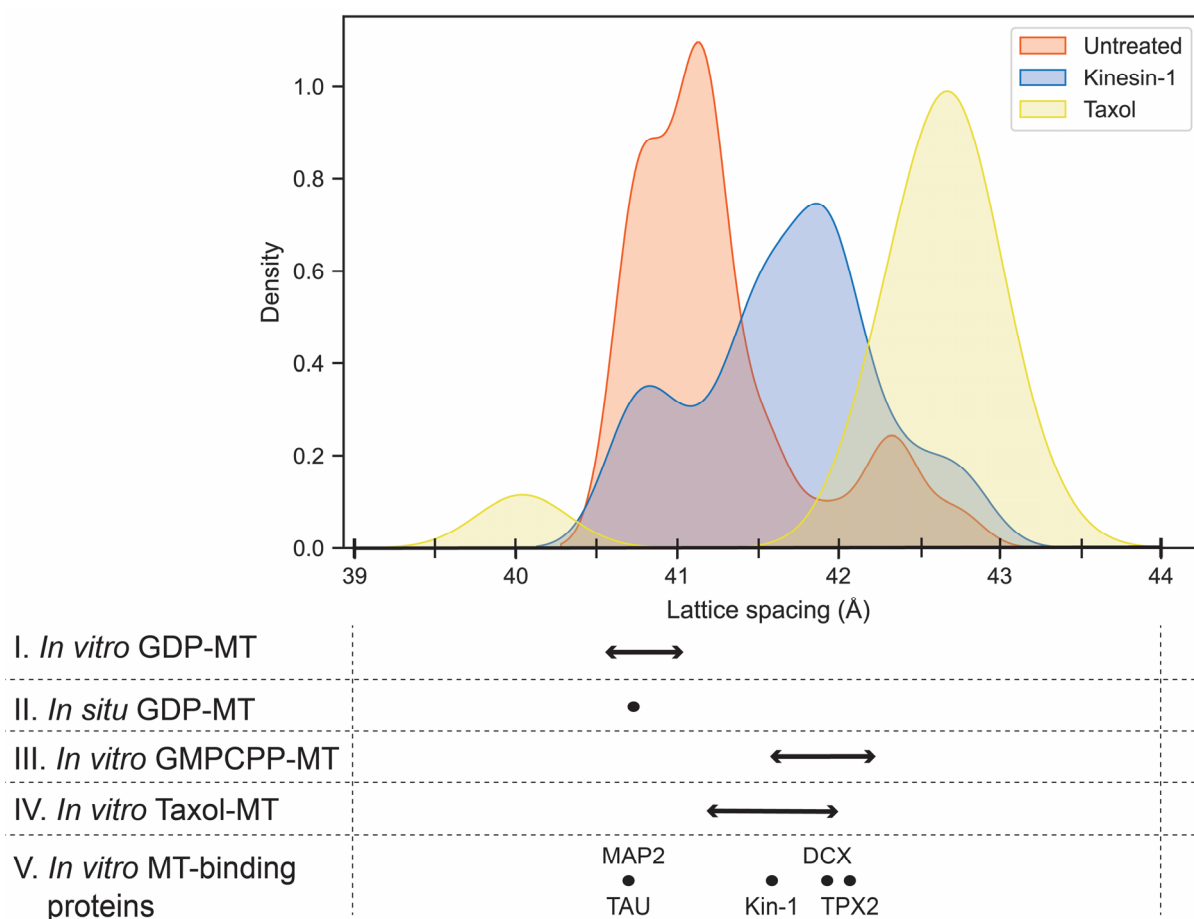

575

576 Figure 4. ***In situ* microtubule landscape in relation to previously reported lattice spacings.** Upper  
 577 panel shows a density distribution calculated from the different lattice spacing datasets measured here.  
 578 The table below shows the reported lattice spacings for the GDP lattice both *in vitro* and *in situ* (row I  
 579 and II), and for *in vitro* GMPCPP and Taxol-bound lattices (row III and IV). Row V shows MT-binding  
 580 proteins for which binding in relationship to the microtubule lattice spacing has been investigated.  
 581 References can be found in supplementary table 1.

582

583

584 SUPPLEMENTARY MATERIALS

585

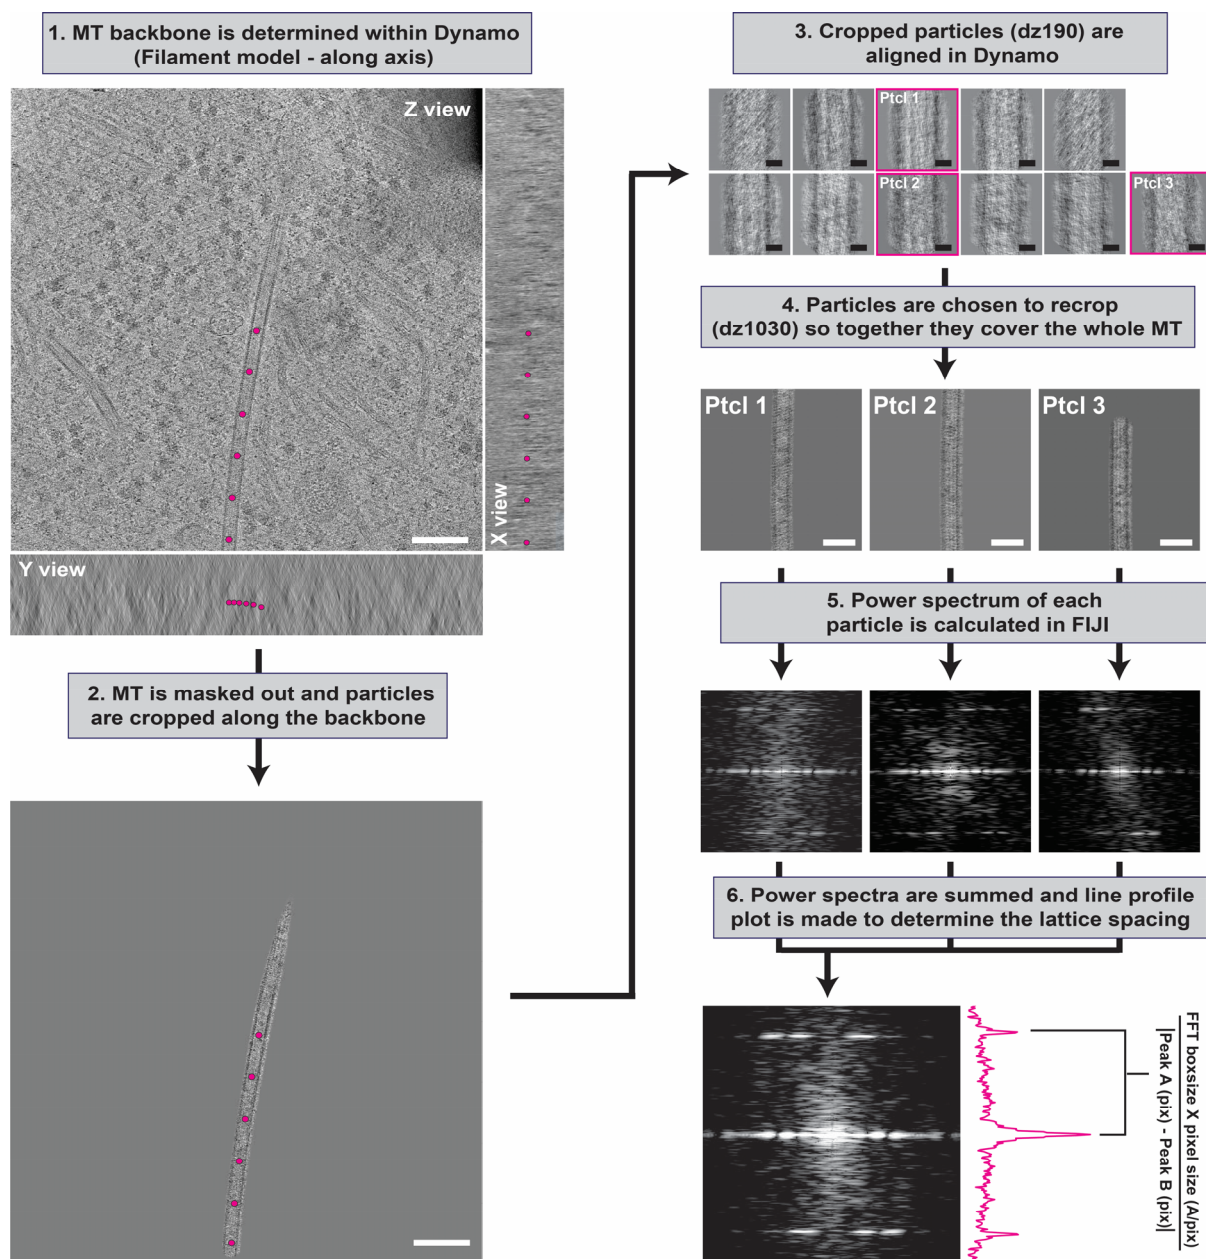

586

587 Supplemental Figure 1. *In situ* layer line analysis workflow. Graphical depiction of the steps  
 588 performed during the layer line analysis. (Step 1) Microtubule backbone is picked in dynamo. (Step 2)  
 589 Using the backbone coordinates, a mask around the microtubule is generated and particles are cropped.  
 590 (Step 3) The cropped particles (box size 190) are aligned and picked so that after recropping (step 4)  
 591 with a box size of 1030 the whole microtubule is covered. (Step 5) 2D power spectrum of the MIP of  
 592 each particle is calculated. (Step 6) power spectra of all particles part of the same microtubule are  
 593 summed and the final power spectrum is used to localize the layer line and thereby calculate the lattice  
 594 spacing. Scale bars: 100 nm (step 1, 2), 10 nm (step 3), 50 nm (step 4).

595

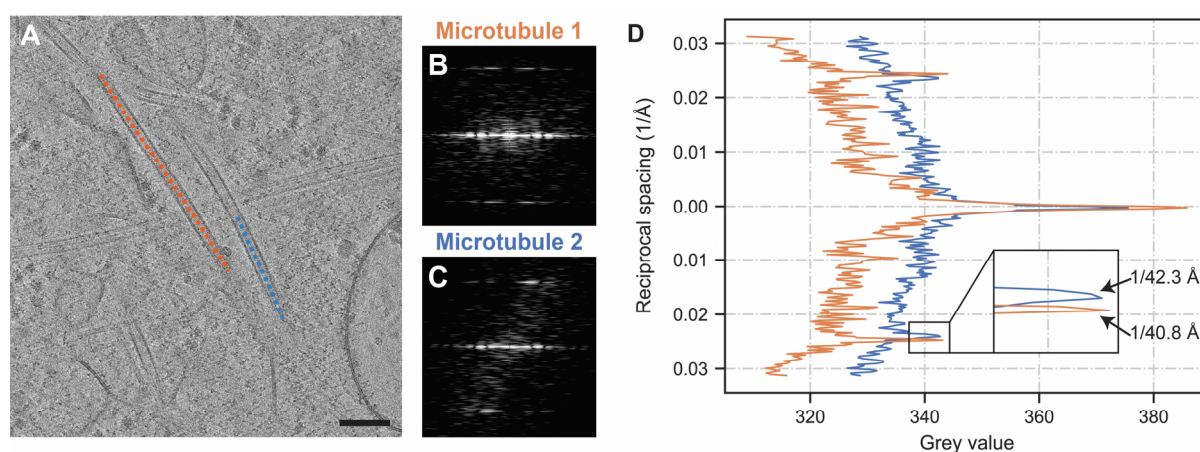

596

597 Supplemental Figure 2. **Expanded and compacted microtubule lattices within one tomogram.**

598 Tomogram where two MT backbones were analysed in parallel. (A) MT backbones were localized and

599 processed as explained in supplemental figure 1. (B and C) show the final, summed power spectra of

600 MT1 (orange) and MT2 (blue). (D) Layer line plot of the summed power spectra of MT1 and MT2.

601 Scale bar: 100 nm (A).

602

603

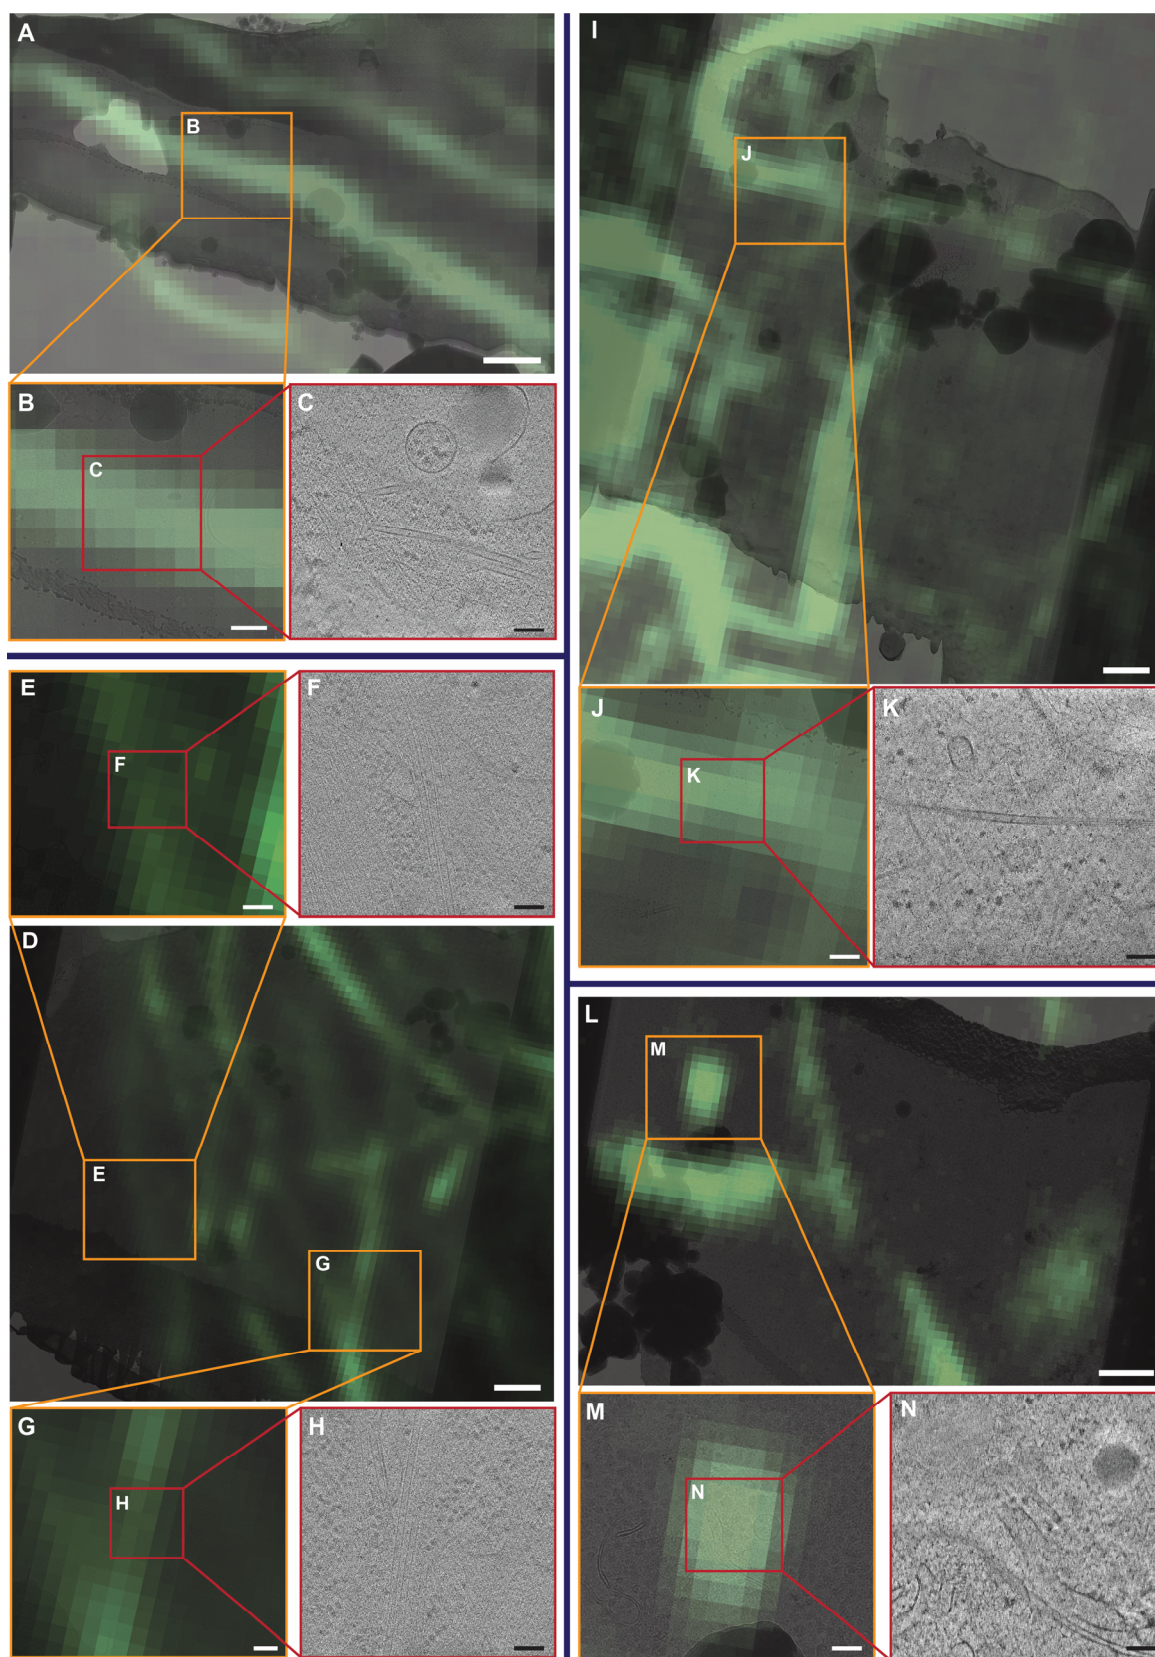

604

605 Supplemental Figure 3. **Kinesin-1 bound microtubules found via our cryo-CLEM set up.** (A) TEM  
606 lamella overlaid with correlated rigorm-2xNeonGreen cryo-FM data. (B and C) One time and two time

607 zoom in of the region of interest with the correlated microtubules. (**D-F, D/G/H, I-K and L-N**) Similar  
 608 examples of correlated microtubules. Scale bars: 1  $\mu\text{m}$  (**A, D, I, L**), 300 nm (**B, E, G, J, M**) and 100  
 609 nm (**C, F, H, K, N**).

610

611 *Supplementary table 1. Literature that investigates the microtubule lattice spacings with respect to*  
 612 *nucleotide state, Taxol treatment and MT-binding proteins.*

| Microtubule component                         | References                                                                                                                             |
|-----------------------------------------------|----------------------------------------------------------------------------------------------------------------------------------------|
| <b>I. <i>In vitro</i> GDP-MT</b>              | (Estevez-Gallego et al., 2020; Hyman et al., 1995; LaFrance et al., 2021; Rai et al., 2019; Vale et al., 1994; Zhang et al., 2018)     |
| <b>II. <i>In situ</i> GDP-MT</b>              | (Watanabe et al., 2020)                                                                                                                |
| <b>III. <i>In vitro</i> GMPCPP-MT</b>         | (Estevez-Gallego et al., 2020; Hyman et al., 1995; Kellogg et al., 2017; LaFrance et al., 2021; Vale et al., 1994; Zhang et al., 2018) |
| <b>IV. <i>In vitro</i> Taxol-MT</b>           | (Alushin et al., 2014; Estevez-Gallego et al., 2020; Kellogg et al., 2017; Rai et al., 2019; Vale et al., 1994)                        |
| <b>V. <i>In vitro</i> MT-binding proteins</b> | (Manka and Moores, 2018b; Peet et al., 2018; Shima et al., 2018; Siahaan et al., 2021; Zhang et al., 2018)                             |

613

## 614 List with abbreviations

| Abbreviation  | Meaning                                             |
|---------------|-----------------------------------------------------|
| <b>CLEM</b>   | Correlative light and electron microscopy           |
| <b>GMPCPP</b> | Guanylyl-( $\alpha,\beta$ )-methylene-diphosphonate |
| <b>FIB</b>    | Focused ion beam                                    |
| <b>FM</b>     | Fluorescence microscopy                             |
| <b>MAP</b>    | Microtubule associated proteins                     |
| <b>MIP</b>    | Maximum image projection                            |
| <b>MT</b>     | Microtubule                                         |
| <b>PTM</b>    | Post-translational modification                     |
| <b>SEM</b>    | Scanning electron microscopy                        |
| <b>TEM</b>    | Transmission electron microscopy                    |

615 (Standard abbreviations: GTP, GDP, NA, WT)

616

617
